# Supplementary material for: Thwaites Eastern Ice Shelf cavity observations reveal multiyear sea ice dynamics and deepwater warming in Pine Island Bay, West Antarctica
Source: Copernicus journal article supplement (doi:10.5194/os-21-2605-2025), 2025-10-28
Supplement: Supplementary file [file os-21-2605-2025-supplement-title-page.pdf › os-21-2605-2025-supplement-title-page.pdf]

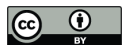

*Supplement of*

## **Thwaites Eastern Ice Shelf cavity observations reveal multiyear sea ice dynamics and deepwater warming in Pine Island Bay, West Antarctica**

**Christian T. Wild et al.**

*Correspondence to:* Christian T. Wild ([christian.wild@uibk.ac.at](mailto:christian.wild@uibk.ac.at))

- [os-21-2605-2025-supplement-title-page.pdf](#)
- [PIB\\_SAR\\_Scenes.gif](#)

The copyright of individual parts of the supplement might differ from the article licence.
